# Supplementary material
Source: Springer Nature journal article supplement (https://www.springermedizin.de/resource/supplementary/13054_2013_2889_MOESM3_ESM.pdf/9714176)
Supplement: MOESM3 [file 9714176]

**Additional File 3: Table describing the barriers score at baseline and follow up and the change in barriers score for each item, subscale, and overall**

| Barrier                                                                                                             | Before<br>(n=182)  | After<br>(n=118)   | Change<br>in Score | Site Range  |               | P-value       |
|---------------------------------------------------------------------------------------------------------------------|--------------------|--------------------|--------------------|-------------|---------------|---------------|
|                                                                                                                     | Mean Score (SD)    | Mean Score (SD)    |                    | Min         | Max           |               |
| <b>Overall Score</b>                                                                                                | <b>30.5 (23.1)</b> | <b>20.8 (22.7)</b> | <b>-9.7</b>        | <b>-4.3</b> | <b>-26.04</b> | <b>0.0004</b> |
| <b>Subscale 1: Guideline Recommendations and implementation Strategies</b>                                          | <b>23.8 (24.4)</b> | <b>16.9 (26.7)</b> | <b>-6.9</b>        | <b>-1.6</b> | <b>-18.1</b>  | <b>0.02</b>   |
| 1. Current scientific evidence supporting some nutrition interventions is inadequate to inform practice.            | 22.9 (29.9)        | 17.8 (29.8)        | -5.1               | 0.8         | -21.0         | 0.15          |
| 2. The current national guidelines for nutrition are not readily accessible when I want to refer to them.           | 31.3 (26.3)        | 15.8 (29.5)        | -15.5              | -7.2        | -25.0         | <0.0001       |
| 3. The language of the recommendations of the current national guidelines for nutrition are not easy to understand. | 21.6 (31.9)        | 13.8 (27.0)        | -7.8               | -2.7        | -27.4         | 0.03          |
| 4. No feeding protocol in place to guide the initiation and progression of enteral nutrition.                       | 24.5 (31.3)        | 19.5 (33.6)        | -5.1               | 1.1         | -15.1         | 0.19          |
| 5. Current feeding protocol is outdated.                                                                            | 18.5 (29.4)        | 17.5 (32.2)        | -1.0               | 0.8         | -15.7         | 0.79          |
| <b>Subscale 2: ICU Resources</b>                                                                                    | <b>30.5 (31.1)</b> | <b>20.9 (28.7)</b> | <b>-9.6</b>        | <b>0.3</b>  | <b>34.1</b>   | <b>0.008</b>  |
| 6. Not enough nursing staff to deliver                                                                              | 18.9 (31.8)        | 11.9 (27.4)        | -7                 | 0.2         | -33.3         | 0.05          |

|                                                                                                                             |                    |                    |              |             |              |               |  |
|-----------------------------------------------------------------------------------------------------------------------------|--------------------|--------------------|--------------|-------------|--------------|---------------|--|
| adequate nutrition.                                                                                                         |                    |                    |              |             |              |               |  |
| 7. Enteral formula not available on the unit.                                                                               | 34.2 (38.3)        | 22.3 (36.2)        | -11.9        | -3.8        | -30.2        | 0.007         |  |
| 8. No or not enough feeding pumps on the unit.                                                                              | 38.3 (38.5)        | 28.5 (36.5)        | -9.7         | 2.3         | -38.9        | 0.03          |  |
| <b>Subscale 3: Dietician Support</b>                                                                                        | <b>29.7 (26.9)</b> | <b>21.1 (28.5)</b> | <b>-8.6</b>  | <b>-1.4</b> | <b>-18.1</b> | <b>0.009</b>  |  |
| 9. Waiting for the dietician to assess the patient.                                                                         | 28.2 (33.8)        | 17.2 (30.7)        | -11.0        | -5.0        | -23.0        | 0.004         |  |
| 10. Not enough dietician time dedicated to the ICU during regular weekday hours.                                            | 22.9 (32.8)        | 13.8 (27.7)        | -9.1         | -2.6        | -19.8        | 0.01          |  |
| 11. No or not enough dietician coverage during weekends and holidays.                                                       | 37.4 (36.2)        | 28.0 (36.7)        | -9.4         | -2.4        | -19.4        | 0.03          |  |
| 12. Not enough time dedicated to education and training on how to optimally feed patients.                                  | 30.4 (31.8)        | 25.4 (36.6)        | -5.0         | 2.2         | -17.9        | 0.21          |  |
| <b>Subscale 4: Delivery of Enteral Nutrition to the Patient</b>                                                             | <b>37.4 (27.7)</b> | <b>25.4 (27.3)</b> | <b>-12.0</b> | <b>-2.3</b> | <b>-36.0</b> | <b>0.0003</b> |  |
| 13. Delay in physicians ordering the initiation of EN.                                                                      | 37.9 (34.6)        | 27.7 (33.3)        | -10.2        | -2.1        | -27.0        | 0.01          |  |
| 14. No feeding tube in place to start feeding.                                                                              | 34.2 (36.1)        | 24.0 (36.4)        | -10.2        | 0.8         | -46.8        | 0.02          |  |
| 15. Delays in initiating motility agents in patients not tolerating enteral nutrition (i.e. high gastric residual volumes). | 32.8 (34.6)        | 21.8 (31.8)        | -11.0        | 2.2         | -44.0        | 0.005         |  |

|                                                                                                                                                |                    |                    |              |             |              |               |
|------------------------------------------------------------------------------------------------------------------------------------------------|--------------------|--------------------|--------------|-------------|--------------|---------------|
| 16. Delays and difficulties in obtaining small bowel access in patients not tolerating enteral nutrition (i.e. high gastric residual volumes). | 40.5 (34.7)        | 29.9 (35.5)        | -10.5        | -0.1        | -35.7        | 0.01          |
| 17. In resuscitated, hemodynamically stable patients, other aspects of patient care still take priority over nutrition.                        | 41.6 (35.2)        | 23.7 (32.4)        | -17.8        | -12.7       | -26.6        | <0.0001       |
| <b>Subscale 5: Critical Care Provider Attitudes and Behaviour</b>                                                                              | <b>31.1 (28.0)</b> | <b>19.8 (23.6)</b> | <b>-11.4</b> | <b>-2.6</b> | <b>-21.9</b> | <b>0.0003</b> |
| 18. Non-ICU physicians (i.e. surgeons, gastroenterologists) requesting patients not be fed enterally.                                          | 35.2 (35.5)        | 28.8 (35.9)        | -6.4         | -2.0        | -20.3        | 0.13          |
| 19. Nurses failing to progress feeds as per the feeding protocol.                                                                              | 27.1 (33.9)        | 14.4 (26.3)        | -12.7        | -0.3        | -22.6        | 0.0003        |
| 20. Fear of adverse events due to aggressively feeding patients.                                                                               | 27.5 (33.1)        | 14.4 (26.7)        | -13.1        | -8.9        | -25.8        | 0.0002        |
| 21. Feeding being held too far in advance of procedures or operating room visits.                                                              | 34.8 (35.7)        | 21.4 (31.9)        | -13.3        | 4.1         | -23.8        | 0.0011        |
